# Supplementary material for: PRKAR1A and SDCBP Serve as Potential Predictors of Heart Failure Following Acute Myocardial Infarction
Source: PubMed Central journal article supplement (PMC9110666; doi:10.3389/fimmu.2022.878876), 2022-05-03
Supplement: Table_6.pdf [file Table_6.pdf]

**TABLE 6. Overlapped genes between GSE11947 and GSE59867**

| Gene symbol | Module      |
|-------------|-------------|
| SRP9        | greenyellow |
| RAB5A       | greenyellow |
| SDCBP       | greenyellow |
| DCK         | greenyellow |
| RAB1A       | greenyellow |
| RAD21       | greenyellow |
| VAMP3       | greenyellow |
| SPTBN1      | greenyellow |
| PSMD10      | greenyellow |
| SMNDC1      | greenyellow |
| ZNF217      | greenyellow |
| SLC38A2     | greenyellow |
| ME2         | greenyellow |
| TXNRD1      | greenyellow |
| TAF7        | greenyellow |
| SERP1       | greenyellow |
| NUP153      | greenyellow |
| ARHGAP12    | greenyellow |
| SPRED2      | greenyellow |
| CSAD        | greenyellow |
| TMEM2       | greenyellow |
| PRKDC       | greenyellow |
| ZBED4       | greenyellow |
| CAPZA2      | greenyellow |
| SIAH1       | greenyellow |
| CCNG1       | greenyellow |
| SCOC        | greenyellow |
| MTRR        | greenyellow |
| MAT2B       | greenyellow |
| AKR1D1      | greenyellow |
| GDI2        | greenyellow |
| PPM1B       | greenyellow |
| DNAJC7      | greenyellow |
| DNAJB6      | greenyellow |
| VRK2        | greenyellow |
| TLK2        | greenyellow |
| SNAP23      | greenyellow |
| GALNT7      | greenyellow |
| SSFA2       | greenyellow |
| TOB1        | greenyellow |
| WDFY1       | greenyellow |
| RHOT1       | greenyellow |
| PRKAR1A     | greenyellow |
| MRPL44      | greenyellow |

PPP2CB  
RNF6  
PIAS1

greenyellow  
greenyellow  
greenyellow
